# Supplementary material for: Evaluation and development of a novel pre-treatment method for mulberry leaves to enhance their bioactivity via enzymatic degradation of GAL-DNJ to DNJ
Source: Royal Society of Chemistry journal article supplement (doi:10.1039/d1fo02307a), 2021-01-01
Supplement: d1fo02307a1.pdf [file d1fo02307a1.pdf]

## Supplementary information

Title: Evaluation and development of a novel pre-treatment method for mulberry leave to enhance their bioactivity via enzymatic degradation of GAL-DNJ to DNJ

Soo Takasu<sup>a, b</sup>, Isabella Supardi Parida<sup>a</sup>, Yoshihiro Kojima<sup>c</sup>, Toshiyuki Kimura<sup>d</sup>, and Kiyotaka Nakagawa<sup>a</sup>

<sup>a</sup> Food and Biodynamic Chemistry Laboratory, Graduate School of Agricultural Science, Tohoku University, Sendai, 980-8572, Japan

<sup>b</sup> Laboratory of Pharmaceutical Analytical Chemistry, Gifu Pharmaceutical University, Daigaku-nishi, Gifu 501-1196, Japan

<sup>c</sup> Minato Pharmaceutical Co., Ltd., Tokyo 104-0061, Japan

<sup>d</sup> Advanced Analysis Center, National Agriculture and Food Research Organization, Ibaraki 305-8642, Japan

## Contents

Fig. S1

Fig. S2

HPLC analysis of GAL-DNJ and DNJ for preliminary test

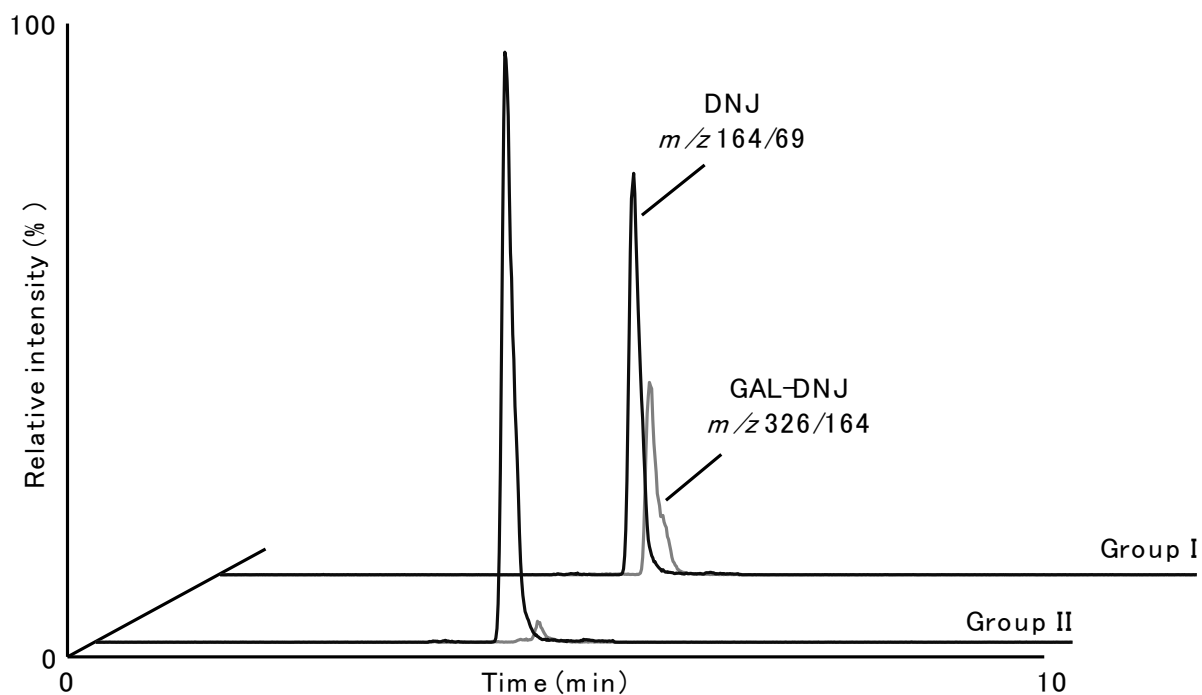

**Fig. S1**

The LC-MS/MS chromatograms of DNJ and GAL-DNJ from plasma sample at 30 minutes after sample oral administration. Group I was given DNJ and GAL-DNJ mixture ( $20 \mu\text{ mol/kg B.W.}$  for each aza-sugar), and Group II was given only DNJ ( $40 \mu\text{ mol/kg B.W.}$ ).

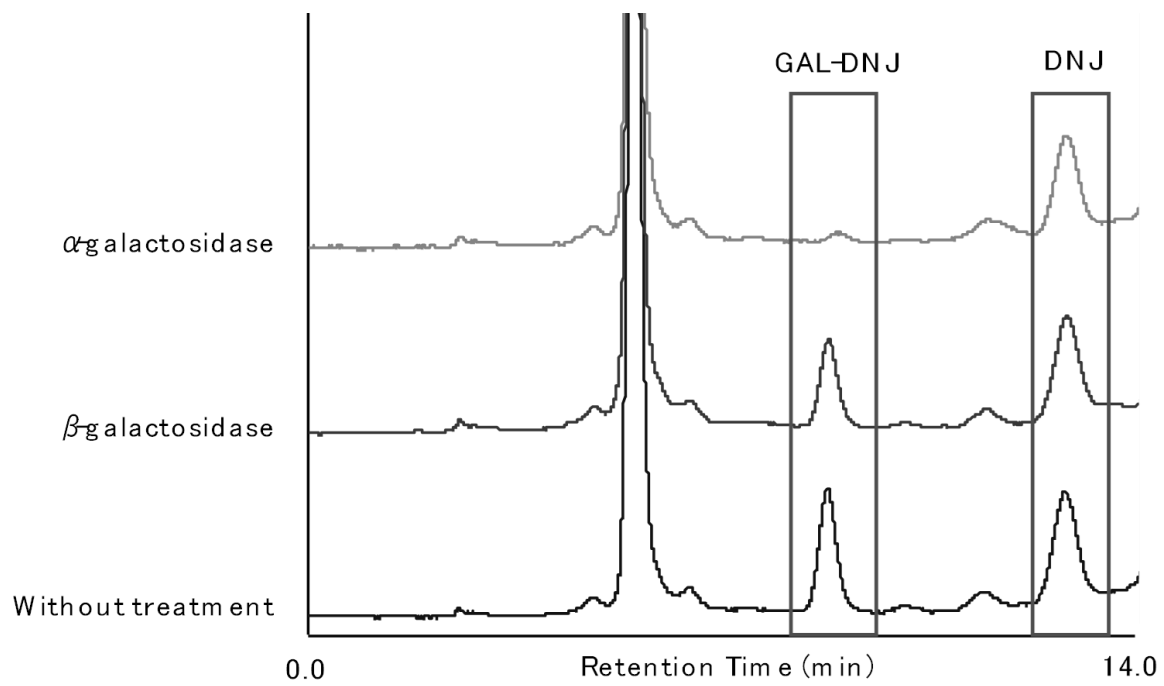

**Fig. S2**

The chromatogram of HPLC analysis of MLE treated with/without  $\alpha$ -galactosidase or  $\beta$ -galactosidase.

### HPLC analysis of GAL-DNJ and DNJ for preliminary test

In the preliminary test, GAL-DNJ and DNJ were derivatized with 9-fluorenylmethyl chloroformate (FMOC) and analyzed using an HPLC fluorescence detector according to the method of Kim *et al.*<sup>1</sup> Briefly, enzymatically-treated MLE were reacted with FMOC-Cl in the borate buffer (pH 8.5) and subjected to HPLC analysis. Chromatographic separations were carried out using a column (Capcell Pak C18 UG 80, 5  $\mu$ m, 4.6 mm  $\times$  250 mm, Shiseido, Japan) at a flow rate of 1.0 mL/min. The column temperature was maintained at 40°C. The analyte was eluted with 50% aqueous methanol solution. After 16.4 minutes of analysis, the column was washed with methanol containing 0.1% formic acid for 7 minutes and equilibrated for 6 minutes. Derivatized DNJ and GAL-DNJ were detected using a fluorescent detector (excitation 254 nm, emission 322 nm).

1 J.-W. Kim, S.-U. Kim, H. S. Lee, I. Kim, M. Y. Ahn and K. S. Ryu, *J Chromatogr A*, 2003, **1002**, 93–99.
